# Supplementary material for: Role and response of primary healthcare services in community end-of-life care during COVID-19: Qualitative study and recommendations for primary palliative care delivery
Source: PubMed Central journal article supplement (PMC9720421; doi:10.1177/02692163221140435), 2023-02
Supplement: sj-pdf-1-pmj-10.1177_02692163221140435.pdf [file sj-pdf-1-pmj-10.1177_02692163221140435.pdf]

**PMJ-22-0169: Role and response of primary healthcare services in community end-of-life care during COVID-19: Qualitative study and recommendations for primary palliative care delivery.**

Supplemental Material 1: Interview Topic Guide

|                                                                                                                                                                                                                                                                                                                                                                     |
|---------------------------------------------------------------------------------------------------------------------------------------------------------------------------------------------------------------------------------------------------------------------------------------------------------------------------------------------------------------------|
| <b>About you</b><br>Please tell me about the work that you do / what do you do in your role?                                                                                                                                                                                                                                                                        |
| <b>What are your roles in palliative and end of life care in the community?</b><br><i>Prompts:</i><br>What is most important to you about this type of care?<br>What works? What doesn't work?                                                                                                                                                                      |
| <b>How has your experience of palliative and end of life care in the community changed through the COVID-19 pandemic?</b><br><i>Prompts:</i><br>In what ways has your practice changed? Personally / as a team                                                                                                                                                      |
| <b>Who else (any other services) do you work closely with?</b><br><i>Prompts:</i><br>How could this be improved?<br>Is there anyone else who should be involved in your opinion?                                                                                                                                                                                    |
| <b>Where there any particular opportunities that arose as a result of the pandemic?</b><br><i>Prompts:</i><br>Are there any innovations that you have seen happen that are particularly good?<br>What would you like to change (or not) in this area of practice in the future?<br>What would you tell service managers / commissioners was needed / needs to stay? |
| <b>Do you have any concerns about the future delivery of palliative and end of life care in the community?</b>                                                                                                                                                                                                                                                      |
| <b>Do you think that medical / nursing staff receive enough training in this area?</b><br><i>Prompts:</i><br>Are there any specific issues that have arisen through the COVID-19 pandemic?<br>Have you had to learn new skills? What are they?<br>How have you learnt them?                                                                                         |
| <b>Can you describe a case that went well?</b>                                                                                                                                                                                                                                                                                                                      |
| <b>Can you describe a case where things didn't go well?</b>                                                                                                                                                                                                                                                                                                         |
